# Supplementary material
Source: ML conference proceedings conference paper supplement (https://openaccess.thecvf.com/content/ICCV2025/html/Habib_CarGait_Cross-Attention_based_ICCV_2025_paper.html)
Supplement: Supplementary file 1 [file Habib_CarGait_Cross-Attention_based_ICCV_2025_supplemental.pdf]

# CarGait: Cross-Attention based Re-ranking for Gait recognition

## Supplementary Material

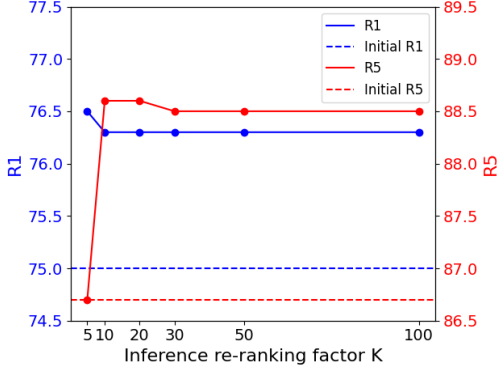

Figure 1. Ablation study on CarGait inference re-ranking factor  $K$ , with SwinGait-3D model trained on *Gait3D* dataset. Rank-1 (R1) and Rank-5 (R5) results are shown in blue (left-hand side) and red (right-hand side), respectively. The dashed lines indicate the initial single-stage model performance, while the solid lines represent the results after CarGait re-ranking.

### 1. Hyperparameters

In the paper, we present an ablation study on the hyperparameters used in CarGait,  $K$  and  $v$ . Both are fixed across all the experiments shown in the paper. The inference re-ranking factor  $K$ , which is the length of the top-ranked list on which re-ranking is performed during inference, is set to 10. The size of the candidate set in training,  $v$ , is set to 30. Here, we present a detailed analysis on  $K$  and  $v$ , using the SwinGait-3D model [3] trained on *Gait3D* dataset [11].

As shown in Fig. 1, CarGait improvements are consistent across different values of  $K$ , with minor changes in R1 (higher for  $K = 5$ ), and in R5 (higher for  $K = 10$  and  $K = 20$ ). Figure 2 presents an ablation study on the top- $v$  candidates (per probe) used to construct the training set, as illustrated in the paper (Method section). Compared to the inference factor  $K$ , the performance variations here are more pronounced. Nevertheless, for all values of  $v$  shown (solid lines in Fig. 2), both Rank-1 and 5 accuracy consistently surpass the initial state (dashed lines). As mentioned, CarGait with  $v = 30$  has been selected as a fixed hyperparameter for all models and datasets to ensure better generalization of our method. That is, even though, in some cases, it might not be the optimal choice.

### 2. Runtime and Memory Analysis

We provide a detailed inference runtime analysis of CarGait re-ranker across different  $K$  values in Fig. 3. Our method involves a certain level of complexity. However, in prac-

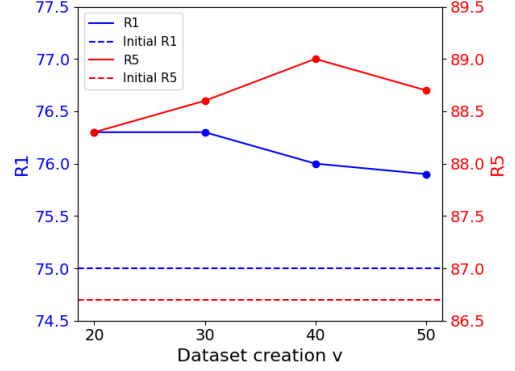

Figure 2. Ablation study on CarGait training dataset creation  $v$ , with SwinGait-3D model trained on *Gait3D* dataset. Rank-1 (R1) and Rank-5 (R5) results are shown in blue (left-hand side) and red (right-hand side), respectively. The dashed lines indicate the initial single-stage model performance, while the solid lines represent the results after CarGait re-ranking.

tice, the inference overhead is only  $\sim 6.5$  [msec] on a single A100 GPU with  $K = 10$ <sup>1</sup>. As mentioned in the paper, the re-ranker size is influenced by the feature map dimensions obtained by the single-stage model. Generally, the number of trainable parameters varies from 2.07M to 9.21M. At inference, the re-ranker has 0.4M parameters at most (compared to the size of single-stage gait models that varies from 2.5M to 13M). Training the model on four A100 GPUs with 40 [GB] of RAM takes approximately 16 hours.

### 3. Experiments on GREW

In the paper (Evaluation section), we demonstrate CarGait’s superiority over the existing re-ranking methods [8, 10, 12] on the *Gait3D* [11] and *OU-MVLP* [9] datasets. Here, we provide an additional comparison on the *GREW* [13] dataset. As shown in Tab. 1, CarGait surpasses existing re-rankers across all five methods in both Rank-1 and Rank-5 accuracy.

### 4. Additional Experiments

In Table 1 of the paper, we exclude results for settings where checkpoints are unavailable. To enrich our evaluation, we independently trained the SwinGait-3D model on two datasets, using the official OpenGait implementation [4]. Although in *GREW* we were not able to reproduce the exact paper results, we provide CarGait performance gains on

<sup>1</sup>For comparison, the first-stage global retrieval takes 0.1 [msec] per probe.

| Method       | Publication | R1   |      |      |             | R5   |      |      |             |
|--------------|-------------|------|------|------|-------------|------|------|------|-------------|
|              |             | KR   | LBR  | GCR  | CG          | KR   | LBR  | GCR  | CG          |
| GaitPart [2] | CVPR 20     | 44.2 | 41.2 | 48.6 | <b>52.5</b> | 60.8 | 65.5 | 65.3 | <b>67.5</b> |
| GaitSet [1]  | AAAI 19     | 44.7 | 41.2 | 48.6 | <b>52.0</b> | 62.6 | 65.5 | 65.3 | <b>68.0</b> |
| GaitBase [5] | CVPR 23     | 57.1 | 51.5 | 60.4 | <b>67.2</b> | 72.2 | 74.9 | 74.8 | <b>78.5</b> |
| DGV2-P3D [3] | ArXiv 23    | 74.6 | 64.3 | 77.4 | <b>79.2</b> | 86.2 | 86.5 | 87.6 | <b>88.7</b> |
| SG++ [6]     | AAAI 24     | 84.2 | 80.4 | 86.0 | <b>88.2</b> | 93.0 | 93.4 | 93.0 | <b>94.6</b> |

Table 1. Rank- $K$  accuracy [%] on *GREW* dataset [13] for different re-ranking methods: k-reciprocal (KR) [12], LBR [8], and GCR [10], compared to CarGait (CG). Best results are in bold.

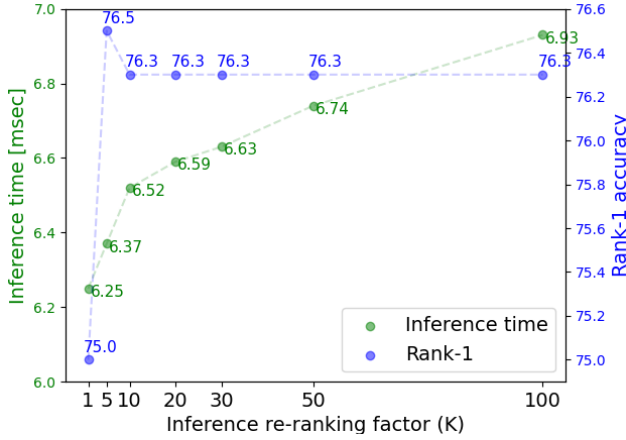

Figure 3. CarGait runtime analysis per probe with varying values of  $K$ . The results were obtained on a single A100 GPU using the SwinGait-3D model and the *Gait3D* dataset. The inference time per probe [in msec] is shown in green (left-hand side), while Rank-1 (R1) performance is depicted in blue (right-hand side).

both datasets (see Tab. 2).

| Method         | <i>GREW</i> |             |            |             | <i>OU-MVLP</i> |             |
|----------------|-------------|-------------|------------|-------------|----------------|-------------|
|                | R1 Initial  | R5 CG       | R1 Initial | R5 CG       | R1 Initial     | CG          |
| SwinGait3D [3] | 78.7        | <b>79.5</b> | 88.6       | <b>89.2</b> | 91.1           | <b>91.3</b> |

Table 2. Rank- $K$  accuracy [%] on additional settings.

## 5. Verification

In our evaluation, we adopt Rank- $K$  and mAP, which are the standard metrics in gait recognition. Here, we highlight the relevance of an important complementary metric: **verification** performance, measured by TPR@FPR. This metric evaluates how reliably and securely a system can verify identities under strict error restrictions, which may be a critical requirement in real-world scenarios.

To this end, we use the *Gait3D* dataset (which includes multiple positives per probe), and the top  $K = 1000$  single-

stage predictions, to calculate TPR@FPR=1e-2 - before and after re-ranking. The results in Tab. 3 demonstrate consistent gains achieved by CarGait.

| Method         | Initial | CG          |
|----------------|---------|-------------|
| GaitPart [2]   | 21.0    | <b>21.9</b> |
| GaitGL [7]     | 21.9    | <b>27.5</b> |
| GaitSet [1]    | 27.1    | <b>39.3</b> |
| GaitBase [5]   | 52.9    | <b>59.5</b> |
| DGV2-P3D [3]   | 65.3    | <b>67.4</b> |
| SwinGait3D [3] | 67.9    | <b>69.3</b> |
| SG++ [6]       | 69.7    | <b>73.7</b> |

Table 3. CarGait enhancements in verification performance (TPR@FPR=1e-2) on the *Gait3D* dataset [11] with  $K = 1000$ .

## 6. Ablations

Table 5 in the paper presents an ablation study using the SwinGait-3D model trained on the *Gait3D* dataset. Here, we extend this analysis with additional ablations focused on the cross-attention module. CarGait employs a single cross-attention block with 8 heads. As shown in Tab. 4, modifying the number of attention blocks or heads results in only a minor effect on performance.

| Method         | #Heads | #Blocks | R1   | R5   | mAP   |
|----------------|--------|---------|------|------|-------|
| Initial        | —      | —       | 75.0 | 86.7 | 66.69 |
| H = 4          | 4      | 1       | 76.6 | 88.8 | 67.61 |
| H = 16         | 16     | 1       | 76.2 | 89.2 | 67.84 |
| B = 2          | 8      | 2       | 76.1 | 89.2 | 67.77 |
| B = 4          | 8      | 4       | 76.3 | 88.8 | 67.65 |
| <b>CarGait</b> | 8      | 1       | 76.3 | 88.6 | 67.59 |

Table 4. Cross-attention ablations with SwinGait-3D model and *Gait3D* dataset. Rank-1 (R1), Rank-5 (R5), and mAP are reported.

## References

- [1] Hanqing Chao, Yiwei He, Junping Zhang, and Jianfeng Feng. Gaitset: Regarding gait as a set for cross-view gait

- recognition. In *Proceedings of the AAAI conference on artificial intelligence*, pages 8126–8133, 2019. [2](#)
- [2] Chao Fan, Yunjie Peng, Chunshui Cao, Xu Liu, Saihui Hou, Jiannan Chi, Yongzhen Huang, Qing Li, and Zhiqiang He. Gaitpart: Temporal part-based model for gait recognition. In *Proceedings of the IEEE/CVF conference on computer vision and pattern recognition*, pages 14225–14233, 2020. [2](#)
- [3] Chao Fan, Saihui Hou, Yongzhen Huang, and Shiqi Yu. Exploring deep models for practical gait recognition, 2023. [1](#), [2](#)
- [4] Chao Fan, Junhao Liang, Chuanfu Shen, Saihui Hou, Yongzhen Huang, and Shiqi Yu. Opengait: Revisiting gait recognition towards better practicality. In *Proceedings of the IEEE/CVF Conference on Computer Vision and Pattern Recognition (CVPR)*, pages 9707–9716, 2023. [1](#)
- [5] Chao Fan, Junhao Liang, Chuanfu Shen, Saihui Hou, Yongzhen Huang, and Shiqi Yu. Opengait: Revisiting gait recognition towards better practicality. In *Proceedings of the IEEE/CVF conference on computer vision and pattern recognition*, pages 9707–9716, 2023. [2](#)
- [6] Chao Fan, Jingzhe Ma, Dongyang Jin, Chuanfu Shen, and Shiqi Yu. Skeletongait: Gait recognition using skeleton maps. In *Proceedings of the AAAI Conference on Artificial Intelligence*, pages 1662–1669, 2024. [2](#)
- [7] Beibei Lin, Shunli Zhang, and Xin Yu. Gait recognition via effective global-local feature representation and local temporal aggregation. In *Proceedings of the IEEE/CVF International Conference on Computer Vision*, pages 14648–14656, 2021. [2](#)
- [8] Chuanchen Luo, Yuntao Chen, Naiyan Wang, and Zhaoxiang Zhang. Spectral feature transformation for person re-identification. In *Proceedings of the IEEE/CVF international conference on computer vision*, pages 4976–4985, 2019. [1](#), [2](#)
- [9] Noriko Takemura, Yasushi Makihara, Daigo Muramatsu, Tomio Echigo, and Yasushi Yagi. Multi-view large population gait dataset and its performance evaluation for cross-view gait recognition. *IPSI transactions on Computer Vision and Applications*, 10:1–14, 2018. [1](#)
- [10] Yuqi Zhang, Qi Qian, Hongsong Wang, Chong Liu, Weihua Chen, and Fan Wang. Graph convolution based efficient re-ranking for visual retrieval. *IEEE Transactions on Multimedia*, 26:1089–1101, 2023. [1](#), [2](#)
- [11] Jinkai Zheng, Xinchun Liu, Wu Liu, Lingxiao He, Chenggang Yan, and Tao Mei. Gait recognition in the wild with dense 3d representations and a benchmark. In *Proceedings of the IEEE/CVF Conference on Computer Vision and Pattern Recognition (CVPR)*, pages 20228–20237, 2022. [1](#), [2](#)
- [12] Zhun Zhong, Liang Zheng, Donglin Cao, and Shaozi Li. Re-ranking person re-identification with k-reciprocal encoding. In *Proceedings of the IEEE conference on computer vision and pattern recognition*, pages 1318–1327, 2017. [1](#), [2](#)
- [13] Zheng Zhu, Xianda Guo, Tian Yang, Junjie Huang, Jiankang Deng, Guan Huang, Dalong Du, Jiwen Lu, and Jie Zhou. Gait recognition in the wild: A benchmark. In *Proceedings of the IEEE/CVF International Conference on Computer Vision (ICCV)*, pages 14789–14799, 2021. [1](#), [2](#)
